# Supplementary material
Source: publisher figshare collection journal article supplement (https://tandf.figshare.com/ndownloader/files/12171074)
Supplement: Supplementary file 1 [file 12171074]

**Table S1.** Summary of stepwise selection for multiple linear regression analysis

| Step | Variable entered | Partial R2 | Model R2 | C(p) | F value | Pr > F |
| --- | --- | --- | --- | --- | --- | --- |
| 1 | NFD | 0.2831 | 0.2831 | 3.1208 | 8.69 | 0.0074 |
| 2 | MinWL | 0.1260 | 0.4092 | 1.0562 | 4.48 | 0.0464 |

**Table S2.** Summary results of multiple linear regression

| Variable | Parameter estimate | Standard error | Type II SS | F value | Pr > F |
| --- | --- | --- | --- | --- | --- |
| Intercept | 1.08769 | 0.10478 | 1.02595 | 107.76 | <0.0001 |
| NFD | -0.01030 | 0.00272 | 0.13614 | 14.30 | 0.0011 |
| MinWL | 0.00376 | 0.00178 | 0.04264 | 4.48 | 0.0464 |
